# Supplementary material for: Ag NCs as a potent antibiofilm agent against pathogenic Pseudomonas aeruginosa and Acinetobacter baumannii and drug-resistant Bacillus subtilis by affecting chemotaxis and flagellar assembly pathway genes
Source: Royal Society of Chemistry journal article supplement (doi:10.1039/d2bm01399a), 2022-01-01
Supplement: d2bm01399a1.pdf [file d2bm01399a1.pdf]

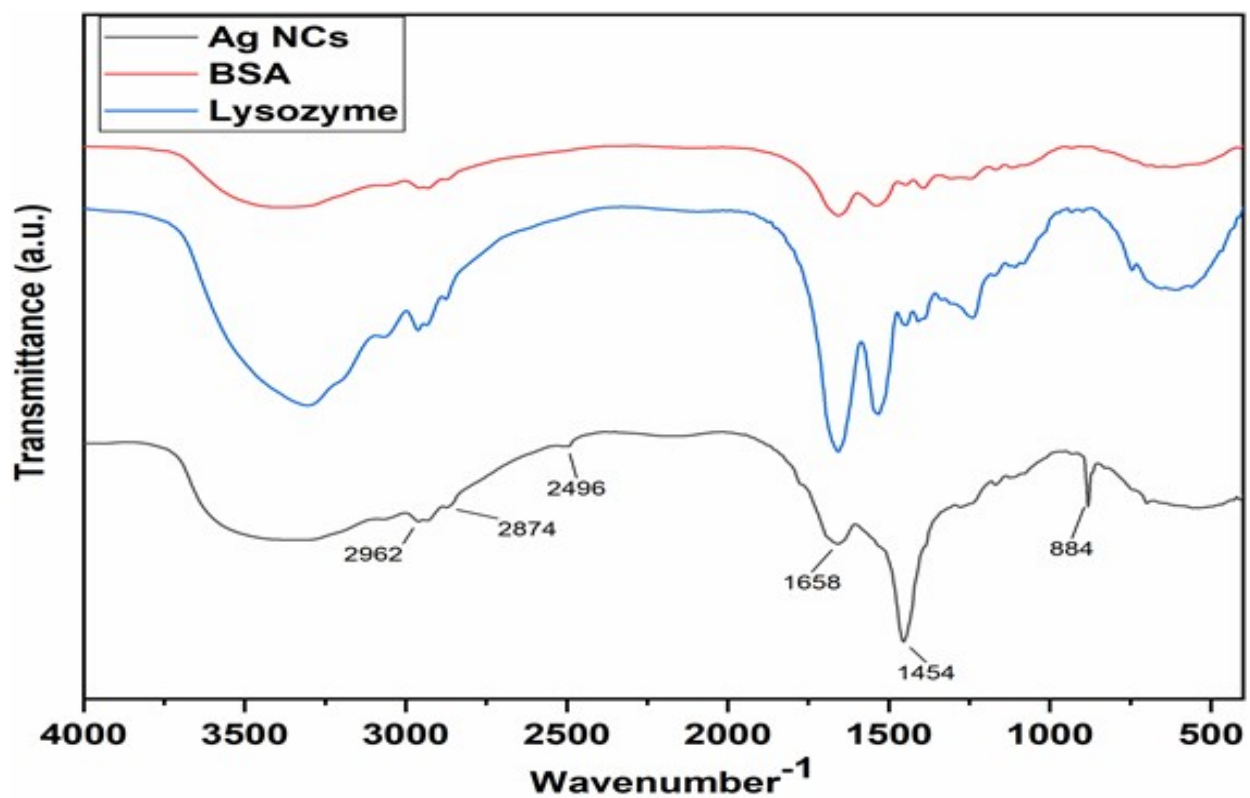

Figure S1 FTIR spectra of Ag NCs, BSA and Lysozyme. where peaks shows at the 2962, 2874, 1658, 1454, 2496 that corresponds to functional groups like NH<sub>2</sub>, CH, C=O (carboxylic group) and C=C stretching of aromatic ring and SH group, respectively.

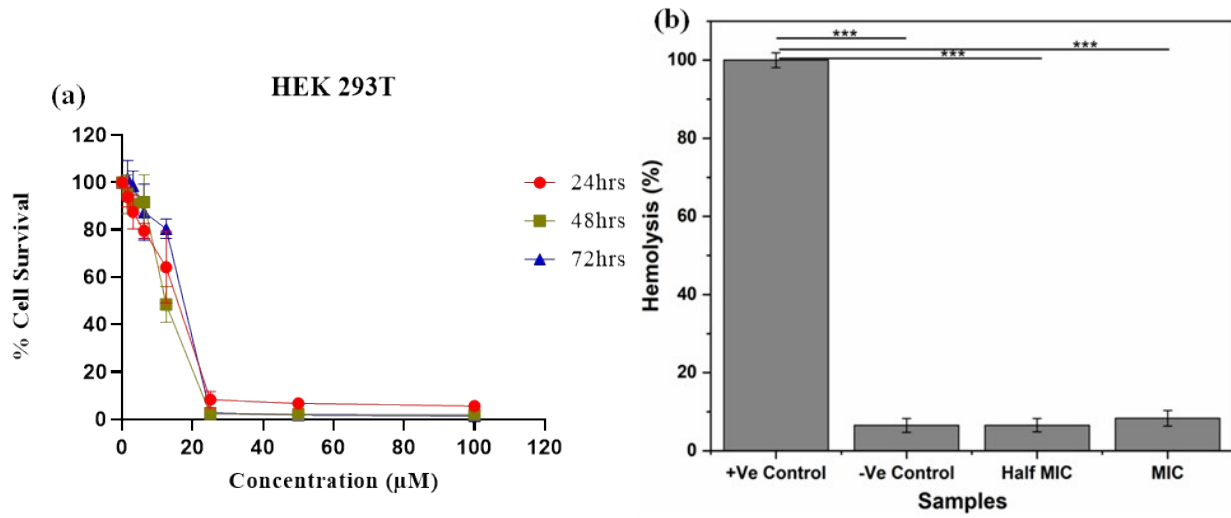

Figure S2 a) Study of cytotoxic effects of Ag NCs on HEK 293T. The cells were treated with Ag NCs at various concentrations ranging from 1.5625 to 100 µM for 24 hr, 48 hr and 72 hr, respectively. The MTT assay was then performed to measure the cell viability. b) Hemolysis assay at different concentrations of Ag NCs (MIC and MIC/2) at physiological pH (7.4). Each experiment was repeated thrice and the result was represented as mean ± SD.

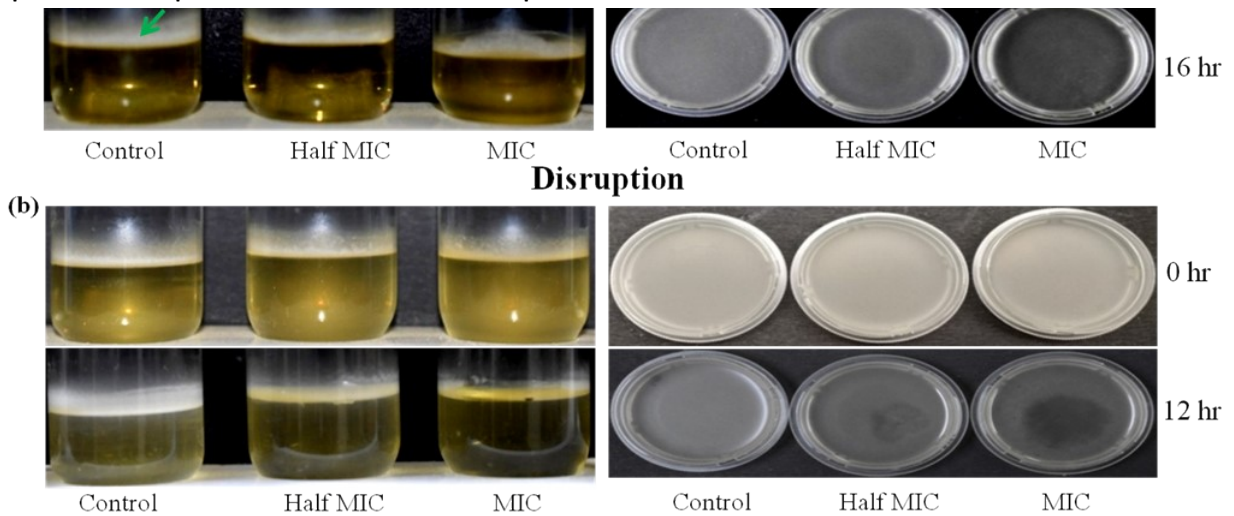

Figure S3 Ag NCs induced inhibition and disruption of biofilm from *B. subtilis* a) Qualitative analysis of biofilm inhibition after 16 hr of treatment by Ag NCs (MIC and half MIC dose) b) Qualitative analysis of biofilm disruption by 12 hr treatment of established biofilm by Ag NCs (MIC and half MIC dose). The mass of biofilm is indicated by green arrow.

**Table S1** List of downregulated genes from DEG analysis

| S.No | Gene ID | Gene name | Log2fold change | pAdj value |
|------|---------|-----------|-----------------|------------|
| 1    | P39603  | ywcE      | -5.45           | 1.2995E-05 |
| 2    | O32241  | sdpl      | -5.12           | 0.00078025 |
| 3    | O32242  | sdpR      | -3.92           | 0.00557969 |
| 4    | P26901  | katA      | -3.52           | 0.03085577 |
| 5    | O34718  | ioIT      | -3.33           | 0.00652648 |
| 6    | O34409  | yflN      | -3.21           | 0.02587952 |
| 7    | O34653  | des       | -3.17           | 0.0316143  |
| 8    | P37960  | mrgA      | -2.94           | 0.04016809 |
| 9    | P19220  | adaB      | -2.89           | 0.01397245 |
| 10   | O32202  | lial      | -2.87           | 0.04853495 |
| 11   | O34742  | opuCD     | -2.84           | 0.01818985 |
| 12   | O31551  | acoR      | -2.7            | 0.03691535 |
| 13   | Q00828  | rapA      | -2.71           | 0.04705609 |

|    |        |       |       |            |
|----|--------|-------|-------|------------|
| 14 | P0AF01 | modB  | -2.56 | 0.03930012 |
| 15 | P25148 | gspA  | -2.54 | 0.04215821 |
| 16 | O34626 | yfmB  | -2.46 | 0.03082434 |
| 17 | O31688 | zosA  | -2.45 | 0.04704492 |
| 18 | O32243 | opuCC | -2.30 | 0.03660402 |
| 19 | O34992 | opuCA | -2.29 | 0.03161246 |
| 20 | O34718 | iolT  | -2.23 | 0.04080891 |

---

**Table S2** List of upregulated genes from DEG analysis

| <b>S.No</b> | <b>Gene ID</b> | <b>Gene name</b> | <b>Log2fold change</b> | <b>pAdj value</b> |
|-------------|----------------|------------------|------------------------|-------------------|
| 1           | Q07833         | WapA             | 5.64                   | 8.9412E-12        |
| 2           | P68577         | sunA             | 5.47                   | 3.7799E-09        |
| 3           | P19947         | rpmD             | 5.14                   | 5.7338E-07        |
| 4           | O05404         | sigV             | 5.13                   | 8.9087E-06        |
| 5           | P63740         | carB             | 4.99                   | 1.1958E-05        |
| 6           | O05403         | rsiV             | 4.98                   | 3.8766E-06        |
| 7           | P25971         | pyrF             | 4.95                   | 4.5328E-06        |
| 8           | Q07836         | wapI             | 4.85                   | 4.73E-08          |
| 9           | P25996         | pyrD             | 4.85                   | 1.8633E-05        |
| 10          | P54507         | tasA             | 4.46                   | 4.5328E-06        |
| 11          | Q81WF6         | pyrE             | 4.42                   | 3.1691E-05        |
| 12          | P20166         | ptsG             | 4.37                   | 3.6432E-06        |
| 13          | P19946         | rplO             | 4.36                   | 0.0004243         |
| 14          | P99147         | carA             | 4.35                   | 0.00021798        |
| 15          | P25983         | pyrK             | 4.29                   | 0.00010446        |
| 16          | P39579         | dltC             | 4.10                   | 0.00018094        |
| 17          | P46898         | rplF             | 4.04                   | 0.00232542        |
| 18          | P39581         | dltA             | 4.02                   | 0.00026834        |
| 19          | P46899         | rplR             | 4.01                   | 0.00323412        |
| 20          | P0CI78         | rplX             | 3.97                   | 0.00176857        |

|    |        |         |      |            |
|----|--------|---------|------|------------|
| 21 | P13714 | ldh     | 3.95 | 0.00018094 |
| 22 | P71014 | bslA    | 3.93 | 3.1691E-05 |
| 23 | Q7A3D6 | oatA    | 3.91 | 0.00083348 |
| 24 | P02394 | rplL    | 3.88 | 0.00409074 |
| 25 | P12878 | rpsN1   | 3.83 | 0.00652648 |
| 26 | P42920 | rplC    | 3.82 | 0.0031688  |
| 27 | Q2FZW3 | dltD    | 3.81 | 0.0016297  |
| 28 | P42923 | rplJ    | 3.80 | 0.00549294 |
| 29 | P02968 | hag     | 3.79 | 0.00348626 |
| 30 | P12873 | rpmC    | 3.74 | 0.0059456  |
| 31 | P20278 | rpmJ    | 3.72 | 0.00811679 |
| 32 | P14577 | rplP    | 3.71 | 0.00758968 |
| 33 | P20282 | rpsM    | 3.64 | 0.00762861 |
| 34 | P12875 | rplN    | 3.60 | 0.01532703 |
| 35 | P9WGF5 | Rv2025c | 3.59 | 0.00291258 |
| 36 | Q08313 | cotX    | 3.59 | 0.000231   |
| 37 | Q81WF0 | pyrC    | 3.58 | 0.0028961  |
| 38 | P55910 | lctP    | 3.56 | 0.00031207 |
| 39 | P21472 | rpsL    | 3.56 | 0.0097659  |
| 40 | P21468 | rpsF    | 3.55 | 0.00758968 |
| 41 | P94571 | bcrC    | 3.48 | 0.00727747 |
| 42 | P21881 | pdhA    | 3.46 | 0.00415688 |
| 43 | P21467 | rpsE    | 3.40 | 0.02226868 |
| 44 | P37877 | ackA    | 3.37 | 0.00079891 |
| 45 | P71012 | fruA    | 3.36 | 0.00084606 |
| 46 | P96611 | ydbP    | 3.32 | 0.00758968 |
| 47 | P12877 | rplE    | 3.29 | 0.02915079 |
| 48 | P45744 | dhbC    | 3.28 | 0.00050911 |
| 49 | P21883 | pdhC    | 3.28 | 0.01456117 |

|    |        |      |      |            |
|----|--------|------|------|------------|
| 50 | P04969 | rpsK | 3.28 | 0.02071379 |
| 51 | P42919 | rplB | 3.25 | 0.02493323 |
| 52 | P08877 | ptsH | 3.24 | 0.01693831 |
| 53 | Q5HEB7 | ddl  | 3.22 | 0.00652648 |
| 54 | P39214 | mcpA | 3.22 | 0.00075374 |
| 55 | P37455 | ssbA | 3.21 | 0.02679884 |
| 56 | P19994 | map  | 3.20 | 0.03036149 |
| 57 | Q08312 | cotZ | 3.16 | 0.00085297 |
| 58 | P21474 | rpsP | 3.16 | 0.01782143 |
| 59 | Q02170 | ysxA | 3.15 | 0.00550595 |
| 60 | P21466 | rpsD | 3.15 | 0.02156978 |
| 61 | Q833W9 | lacC | 3.13 | 0.00291258 |
| 62 | P23453 | fliM | 3.12 | 0.00323412 |
| 63 | P94391 | putC | 3.12 | 0.00492874 |
| 64 | P94356 | yxkC | 3.12 | 0.01301556 |
| 65 | P55874 | rpml | 3.12 | 0.02493323 |
| 66 | P39801 | cotG | 3.10 | 0.00313996 |
| 67 | P21471 | rpsJ | 3.10 | 0.04890216 |
| 68 | Q08311 | cotY | 3.07 | 0.00145562 |
| 69 | O06477 | yfmS | 3.05 | 0.00176857 |
| 70 | P21464 | rpsB | 3.04 | 0.03085577 |
| 71 | P21469 | rpsG | 3.04 | 0.04243709 |
| 72 | P39739 | fliS | 3.02 | 0.00274493 |
| 73 | P26908 | rplU | 3.01 | 0.0316143  |
| 74 | P39070 | clpQ | 2.97 | 0.00314597 |
| 75 | P0ABK2 | cydB | 2.97 | 0.00314597 |
| 76 | P94431 | ycnI | 2.96 | 0.02548038 |
| 77 | P31847 | ypuA | 2.96 | 0.00550595 |
| 78 | P21465 | rpsC | 2.96 | 0.04778271 |

|     |        |            |       |            |
|-----|--------|------------|-------|------------|
| 79  | Q05873 | valS       | 2.95  | 0.0024216  |
| 80  | P40409 | feuA       | 2.95  | 0.00848917 |
| 81  | P29018 | cydD       | 2.93  | 0.00401494 |
| 82  | Q01095 | Flavodoxin | 2.93  | 0.00863243 |
| 83  | O34841 | yoeB       | 2.93  | 0.01202349 |
| 84  | P45743 | dhbB       | 2.933 | 0.00250432 |
| 85  | P21874 | pdhB       | 2.925 | 0.02966292 |
| 86  | P67248 | SAV1236    | 2.91  | 0.01827027 |
| 87  | O31601 | yjbC       | 2.91  | 0.01786897 |
| 88  | P56427 | motB       | 2.90  | 0.00314597 |
| 89  | P39778 | clpY       | 2.90  | 0.00957328 |
| 90  | Q57538 | HI_0664    | 2.87  | 0.00578544 |
| 91  | Q5SHU9 | truA       | 2.86  | 0.0099021  |
| 92  | P9WFM7 | Rv2908c    | 2.86  | 0.01337927 |
| 93  | P42921 | rplD       | 2.84  | 0.04890216 |
| 94  | P40410 | feuB       | 2.81  | 0.01247799 |
| 95  | O34334 | yjoA       | 2.80  | 0.01206026 |
| 96  | P39776 | xerC       | 2.80  | 0.02071379 |
| 97  | P08838 | ptsI       | 2.80  | 0.04464702 |
| 98  | P39802 | cheW       | 2.79  | 0.00459818 |
| 99  | P15874 | grpE       | 2.78  | 0.01369084 |
| 100 | P32132 | typA       | 2.76  | 0.02724455 |
| 101 | Q9WYN9 | cheB       | 2.76  | 0.00713351 |
| 102 | P45745 | dhbF       | 2.76  | 0.00549294 |
| 103 | P67744 | lacR       | 2.75  | 0.02623084 |
| 104 | P29072 | cheA       | 2.75  | 0.00492874 |
| 105 | P80870 | yugI       | 2.74  | 0.03627705 |
| 106 | Q09049 | cydA       | 2.73  | 0.00762861 |
| 107 | P11880 | murF       | 2.72  | 0.00578544 |



|     |        |        |      |            |
|-----|--------|--------|------|------------|
| 108 | O06478 | yfmT   | 2.71 | 0.00551198 |
| 109 | P39071 | dhbA   | 2.68 | 0.00725336 |
| 110 | O34981 | dapH   | 2.68 | 0.00846472 |
| 111 | O31773 | pbpX   | 2.67 | 0.04961252 |
| 112 | P94433 | ycnK   | 2.67 | 0.04704492 |
| 113 | P0AEJ0 | emrB   | 2.67 | 0.01827027 |
| 114 | P05654 | pyrB   | 2.66 | 0.03036149 |
| 115 | P0A1J3 | flgG   | 2.66 | 0.00873229 |
| 116 | O31986 | sunS   | 2.60 | 0.01903934 |
| 117 | Q01465 | mreB   | 2.59 | 0.03007193 |
| 118 | P09424 | mtlD   | 2.59 | 0.02099034 |
| 119 | O06873 | pomA   | 2.58 | 0.01266217 |
| 120 | P10726 | sigD   | 2.58 | 0.00965037 |
| 121 | P40404 | cheD   | 2.57 | 0.02373216 |
| 122 | Q01960 | flhF   | 2.56 | 0.01202349 |
| 123 | P0AC38 | aspA   | 2.55 | 0.02071379 |
| 124 | P40403 | cheC   | 2.55 | 0.00957328 |
| 125 | P68571 | bdbB   | 2.55 | 0.03732145 |
| 126 | C0H3V2 | mtlF   | 2.54 | 0.01827027 |
| 127 | O34798 | pdaC   | 2.53 | 0.04016809 |
| 128 | P39646 | pta    | 2.53 | 0.01782143 |
| 129 | Q08310 | cotW   | 2.53 | 0.01827027 |
| 130 | C1I202 | pnpB   | 2.53 | 0.02493323 |
| 131 | Q01466 | mreC   | 2.52 | 0.02998558 |
| 132 | P39779 | codY   | 2.50 | 0.043491   |
| 133 | O34746 | fabHA  | 2.50 | 0.04961252 |
| 134 | P39758 | abh    | 2.50 | 0.01827027 |
| 135 | Q7A4T3 | SA1683 | 2.50 | 0.03732145 |
| 136 | P67513 | leuS   | 2.49 | 0.01562704 |

|     |        |       |      |            |
|-----|--------|-------|------|------------|
| 137 | O32188 | yusV  | 2.49 | 0.03131935 |
| 138 | P20964 | obg   | 2.49 | 0.02286174 |
| 139 | P54716 | glvA  | 2.49 | 0.02615122 |
| 140 | P39597 | efeN  | 2.48 | 0.01975161 |
| 141 | Q08309 | cotV  | 2.47 | 0.01303186 |
| 142 | P54700 | fliP  | 2.47 | 0.02158911 |
| 143 | P41972 | ileS  | 2.46 | 0.03085577 |
| 144 | P15925 | fpgS  | 2.46 | 0.01284788 |
| 145 | P00961 | glyS  | 2.45 | 0.02158911 |
| 146 | P55192 | ybbA  | 2.44 | 0.01556297 |
| 147 | P18255 | thrS  | 2.44 | 0.03166798 |
| 148 | P40727 | flhB  | 2.42 | 0.02071379 |
| 149 | P40871 | dhbE  | 2.40 | 0.02328062 |
| 150 | P94421 | yclQ  | 2.40 | 0.04255691 |
| 151 | P40411 | feuC  | 2.40 | 0.02099034 |
| 152 | Q02169 | maf   | 2.38 | 0.04115657 |
| 153 | P59852 | lagD  | 2.38 | 0.03210787 |
| 154 | P40291 | sctN  | 2.37 | 0.02149387 |
| 155 | P39815 | trmFO | 2.37 | 0.0200452  |
| 156 | P67011 | alaS  | 2.36 | 0.01780296 |
| 157 | P35620 | flhA  | 2.35 | 0.02775602 |
| 158 | P42199 | tcyA  | 2.34 | 0.02493323 |
| 159 | P42596 | rlmG  | 2.34 | 0.04312013 |
| 160 | O66647 | serS  | 2.31 | 0.02594576 |
| 161 | P25798 | fliF  | 2.31 | 0.02506192 |
| 162 | P39738 | fliD  | 2.30 | 0.03082434 |
| 163 | O31711 | yknY  | 2.30 | 0.04358295 |
| 164 | P39808 | yvyG  | 2.30 | 0.03085577 |
| 165 | P42200 | tcyB  | 2.29 | 0.03085577 |

|     |        |       |      |            |
|-----|--------|-------|------|------------|
| 166 | O32102 | besA  | 2.28 | 0.02615122 |
| 167 | Q5M244 | ecfA2 | 2.26 | 0.03210787 |
| 168 | P40742 | ylxH  | 2.24 | 0.03166798 |
| 169 | P18429 | xynA  | 2.21 | 0.03142669 |
| 170 | Q9WY63 | fliG  | 2.19 | 0.03810607 |
| 171 | P18158 | glpD  | 2.19 | 0.04115657 |
| 172 | Q65JX9 | murB  | 2.18 | 0.04617176 |
| 173 | Q97NF1 | gpsA  | 2.18 | 0.04138928 |
| 174 | P17631 | dnaJ  | 2.16 | 0.03627705 |
| 175 | P54944 | yxeE  | 2.13 | 0.03753502 |
| 176 | P54941 | yxeB  | 2.12 | 0.04255691 |
| 177 | O67081 | glyQ  | 2.12 | 0.04307256 |
| 178 | O34925 | deoD  | 2.11 | 0.04243709 |

---
